# Supplementary material for: Prognostic Impact of Perioperative CA19-9 Levels in Patients with Resected Perihilar Cholangiocarcinoma
Source: PubMed Central journal article supplement (PMC8036534; doi:10.3390/jcm10071345), 2021-03-24
Supplement: jcm-10-01345-s001.pdf [file jcm-10-01345-s001.pdf]

**Supplementary Table S1.** Logistic regression analysis of perioperative prognostic factors associated with 1-year mortality.

|                                 | Univariate |             |                  | Multivariate |            |              |
|---------------------------------|------------|-------------|------------------|--------------|------------|--------------|
|                                 | OR         | 95% CI      | p-value          | OR           | 95% CI     | p-value      |
| Age (years)                     | 1.01       | 0.98-1.05   | 0.450            |              |            |              |
| Albumin (g/dL)                  | 0.90       | 0.47-1.71   | 0.742            |              |            |              |
| Total bilirubin (mg/dL)         | 1.13       | 0.93-1.38   | 0.214            |              |            |              |
| Prothrombin time (min)          | 13.71      | 0.84-223.98 | 0.066            |              |            |              |
| Quartile of $\Delta$ CA19-9     |            |             | 0.688            |              |            |              |
| Q1                              | <i>Ref</i> |             |                  |              |            |              |
| Q2                              | 1.16       | 0.40-3.37   | 0.786            |              |            |              |
| Q3                              | 1.00       | 0.34-2.97   | 1.000            |              |            |              |
| Q4                              | 1.70       | 0.61-4.72   | 0.308            |              |            |              |
| Tumor marker group              |            |             | <b>&lt;0.001</b> |              |            | <b>0.009</b> |
| Low preop / Low postop CA19-9   | <i>Ref</i> |             |                  | <i>Ref</i>   |            |              |
| High preop / Low postop CA19-9  | 1.71       | 0.59-4.95   | 0.319            | 2.49         | 0.62-9.97  | 0.199        |
| Low preop / High postop CA19-9  | 2.80       | 1.30-6.03   | <b>0.008</b>     | 4.76         | 1.42-16.02 | <b>0.012</b> |
| High preop / High postop CA19-9 | 4.83       | 2.26-10.30  | <b>&lt;0.001</b> | 6.62         | 2.10-20.83 | <b>0.001</b> |
| CA19-9 status                   |            |             |                  |              |            |              |
| Normal preoperative CA19-9      | <i>Ref</i> |             |                  |              |            |              |
| Normalization                   | 1.14       | 0.52-2.49   | 0.741            |              |            |              |
| Non-normalization               | 4.25       | 2.04-8.86   | <b>&lt;0.001</b> |              |            |              |
| Portal vein resection           | 2.27       | 1.14-4.52   | <b>0.019</b>     |              |            |              |
| Intraoperative transfusion      | 2.06       | 1.16-3.67   | <b>0.014</b>     | 2.28         | 0.98-5.30  | 0.057        |
| R1 resection                    | 1.90       | 1.07-3.36   | <b>0.030</b>     |              |            |              |
| Size (cm)                       | 1.12       | 0.95-1.31   | 0.177            |              |            |              |
| Portal vein invasion            | 2.35       | 1.18-4.68   | <b>0.015</b>     |              |            |              |
| Lymphovascular invasion         | 2.45       | 1.34-4.46   | <b>0.003</b>     |              |            |              |
| Perineural invasion             | 1.89       | 0.77-4.65   | 0.168            |              |            |              |
| LN metastasis                   | 3.39       | 1.87-6.13   | <b>&lt;0.001</b> | 3.58         | 1.46-8.78  | <b>0.005</b> |
| T stage (T3,4 vs. T1,2)         | 3.31       | 1.84-5.97   | <b>&lt;0.001</b> | 3.08         | 1.30-7.30  | <b>0.011</b> |
| Adjuvant chemotherapy           | 0.57       | 0.31-1.05   | 0.072            | 0.42         | 0.17-1.05  | 0.062        |
| Adjuvant radiotherapy           | 0.77       | 0.37-1.62   | 0.490            |              |            |              |
